# Supplementary material for: Whole Genome Mapping and Re-Organization of the Nuclear and Mitochondrial Genomes of Babesia microti Isolates
Source: PubMed Central journal article supplement (PMC3762879; doi:10.1371/journal.pone.0072657), 2013-09-04
Supplement: pone.0072657.s001.pdf [file pone.0072657.s001.pdf]

Figure S1

## Type I

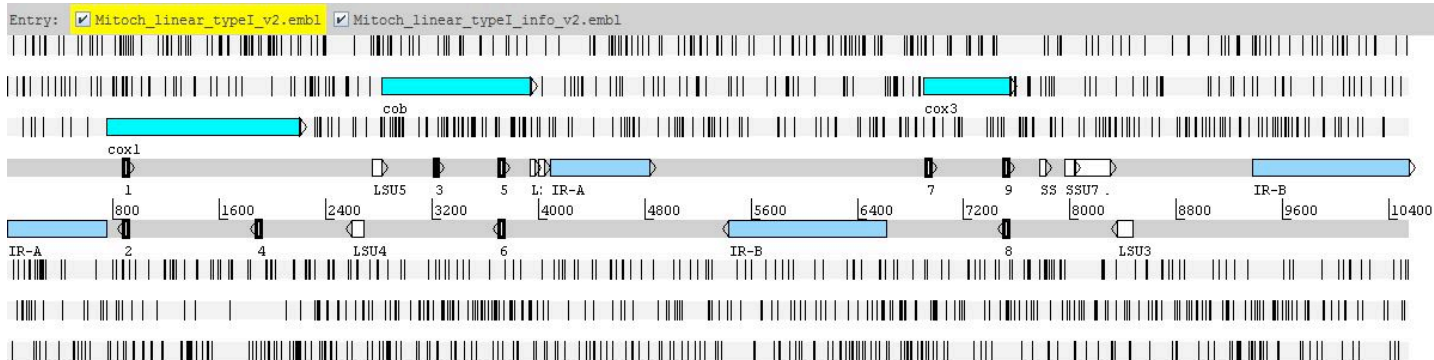

## Type II

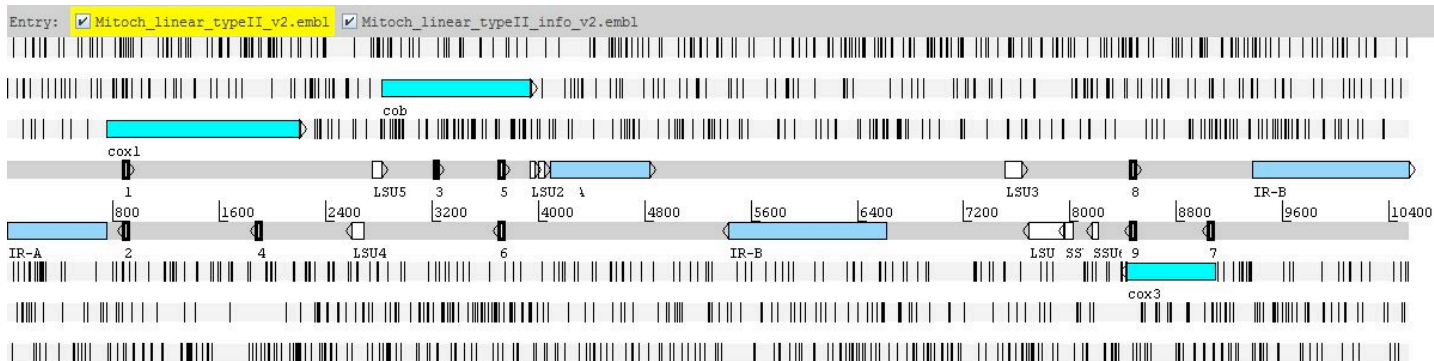

## Type III

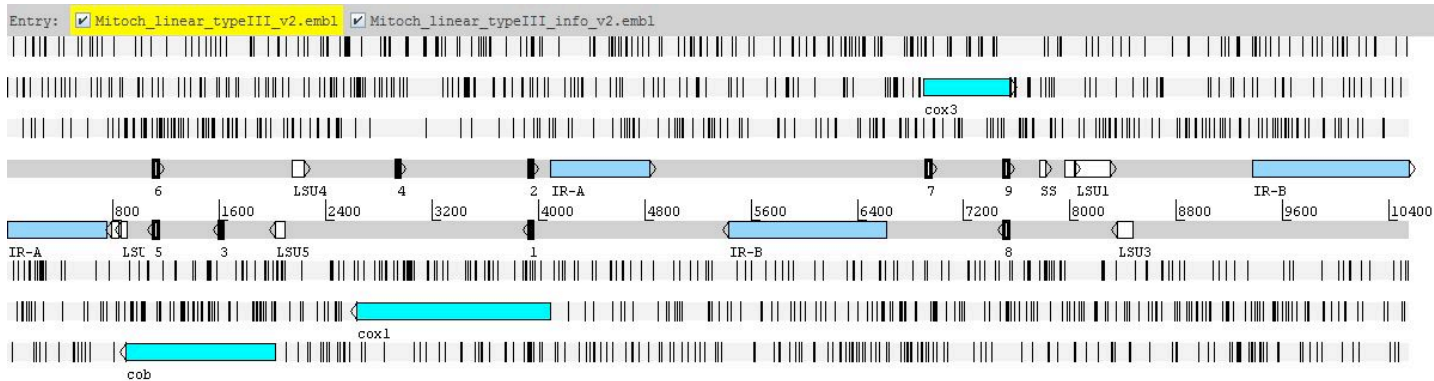

## Type IV

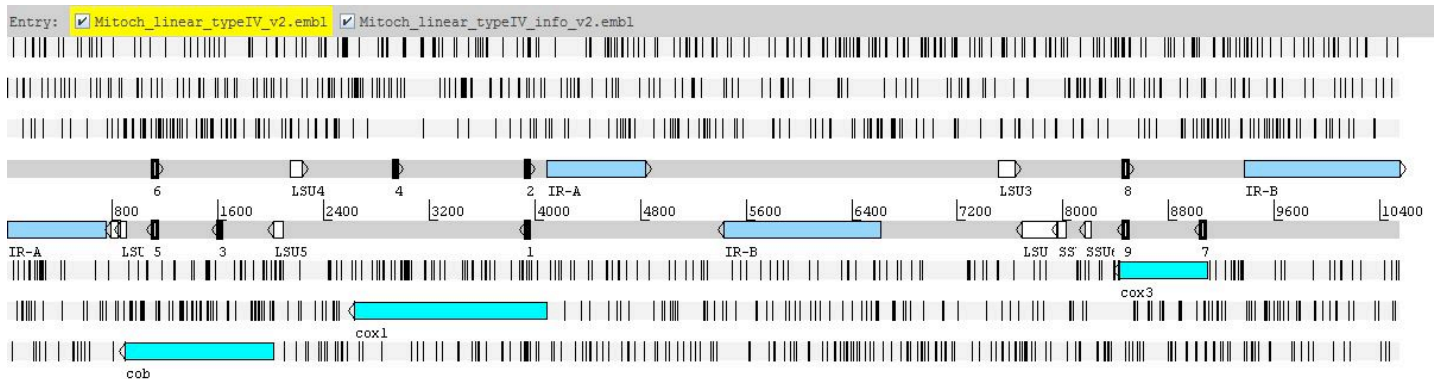

Figure S2

A.

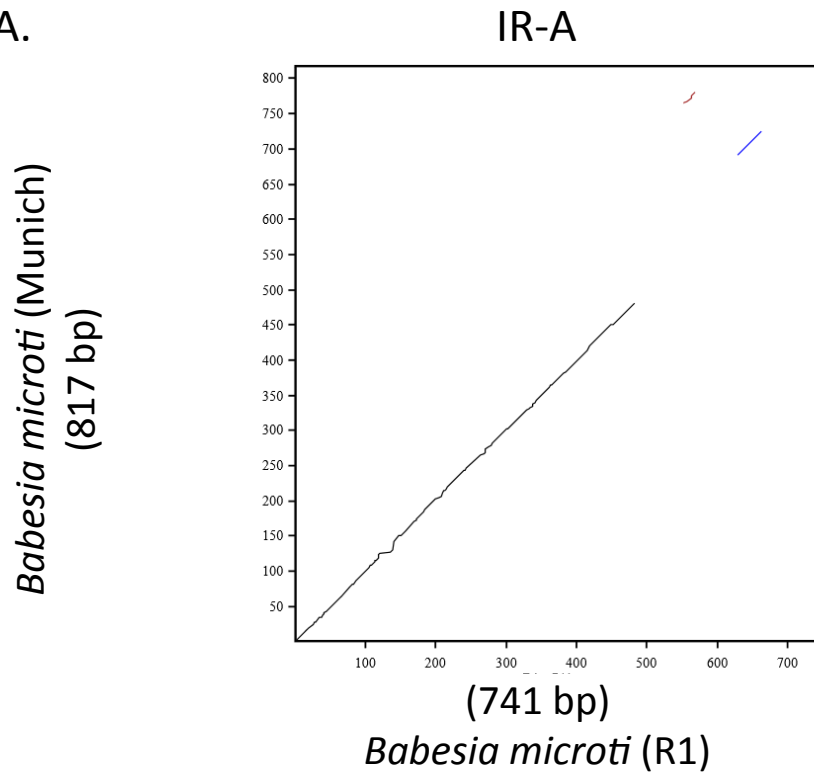

B.

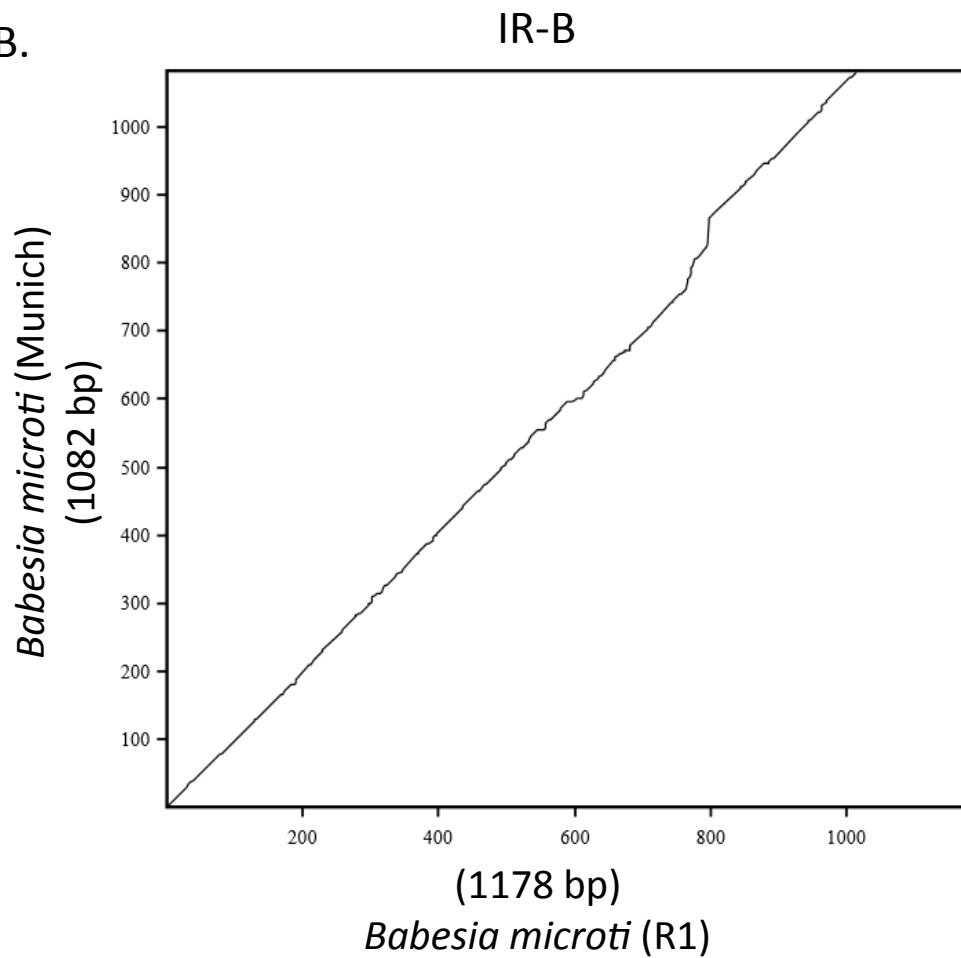

Figure S3

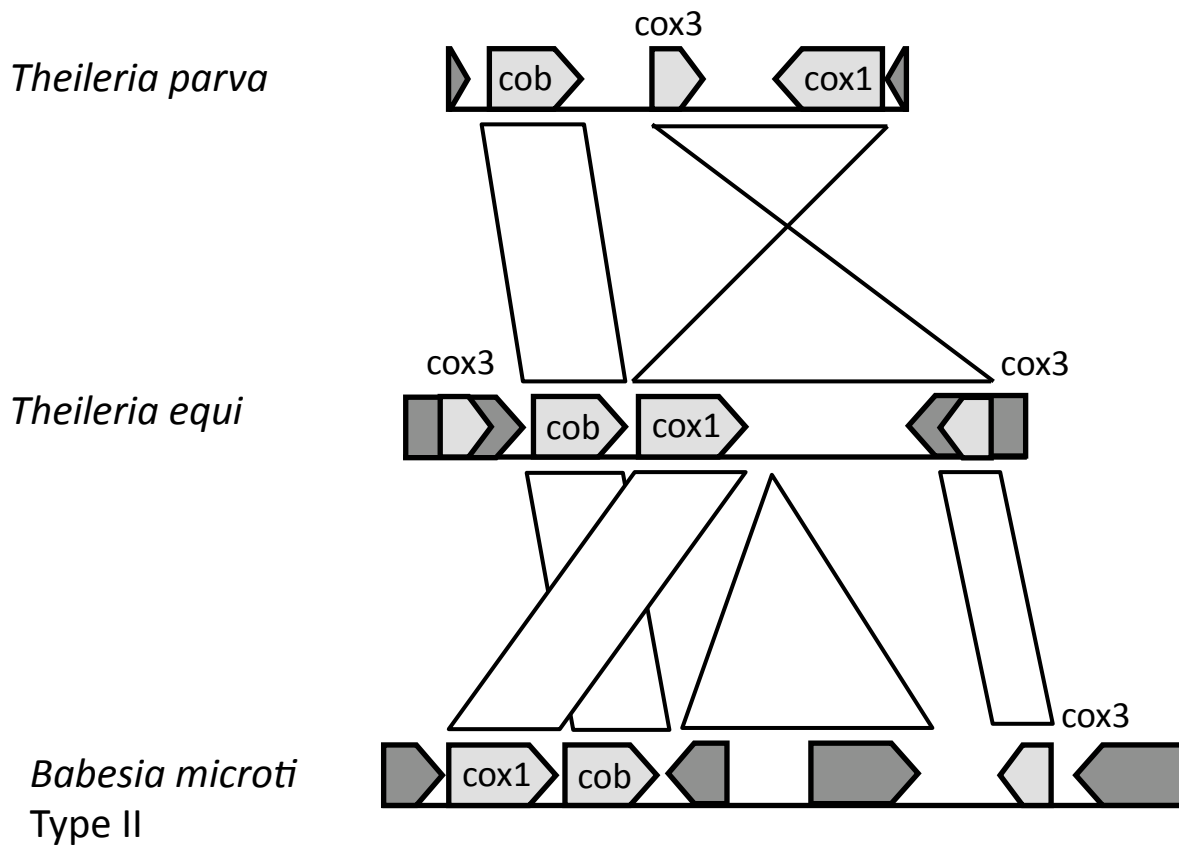

Figure S4

Concatenated  
*Eimeria tenella*

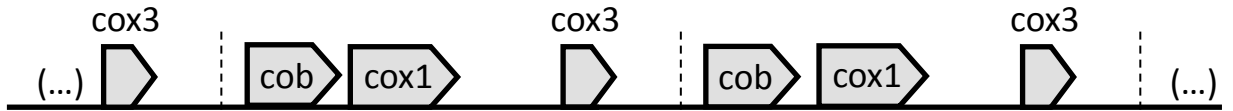

Concatenated  
*Plasmodium falciparum*

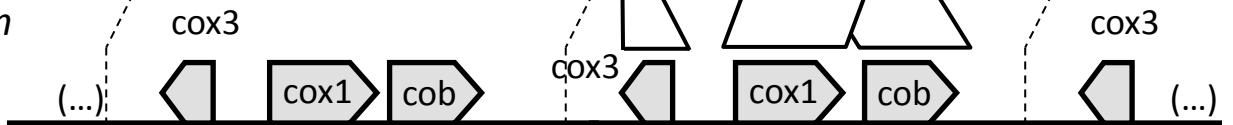

Concatenated  
*Plasmodium gallinaceum*

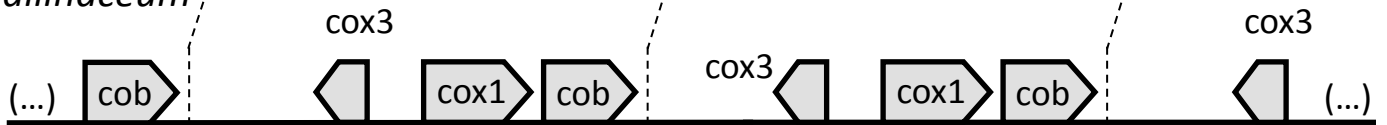

Linear,  
large inverted repeats  
*Babesia microti*  
Type II

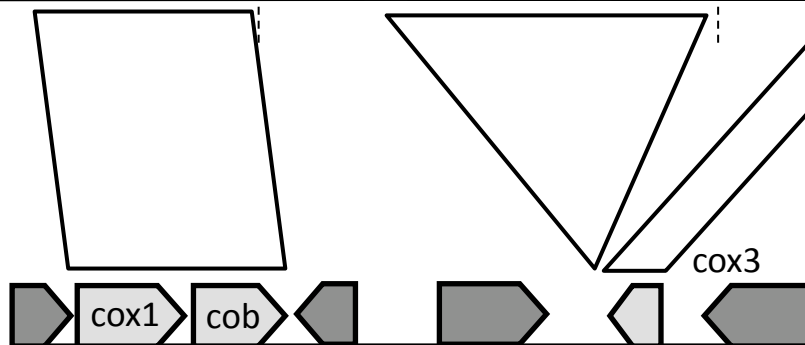

Figure S5

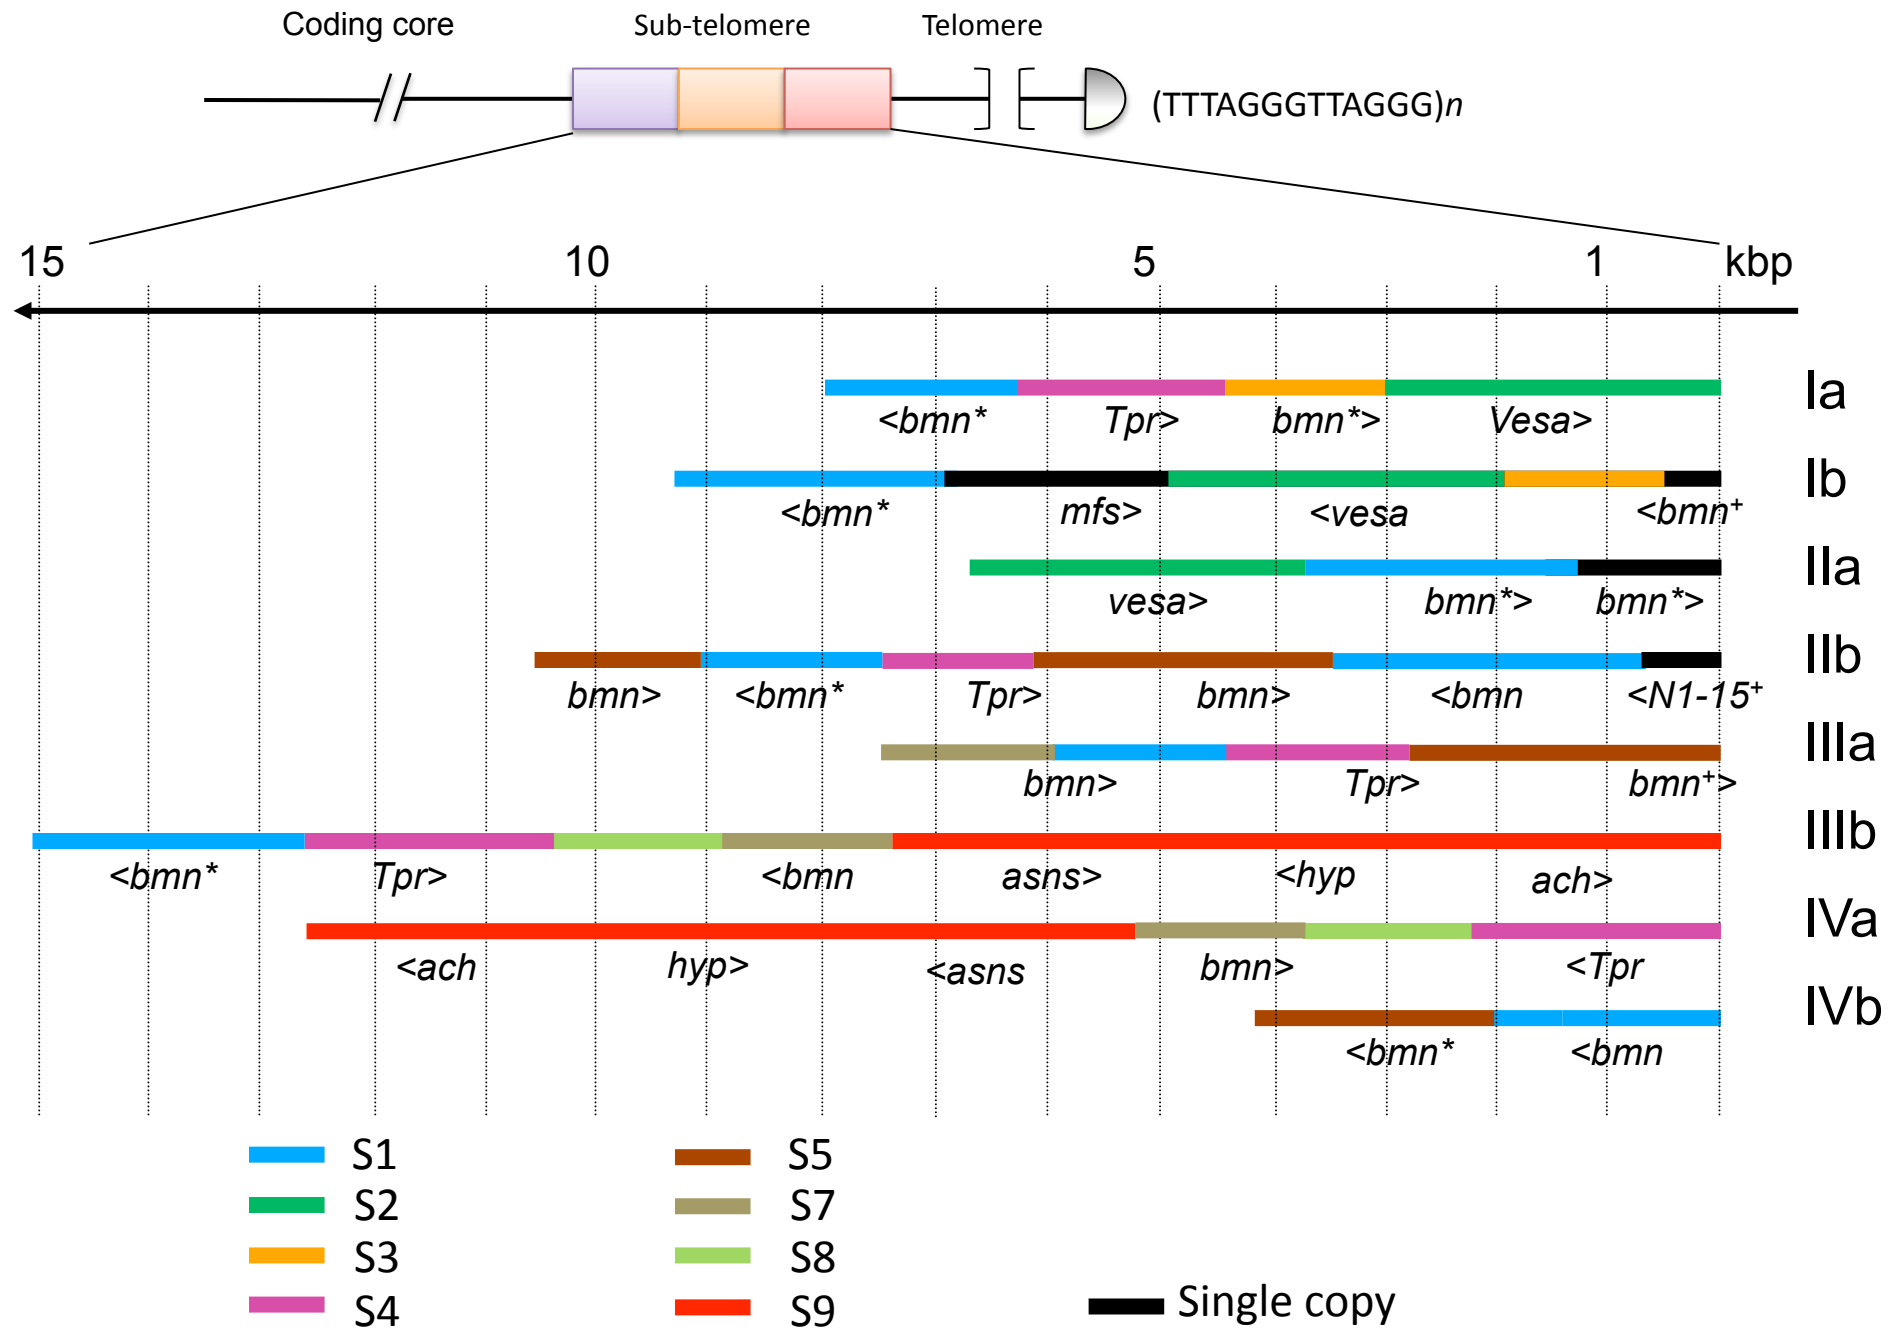

Figure S6

Comparative Genomics of *B. microti* strains IIIa region  
Chr III- 5' region of the R1 and Gray isolates  
Whole Genome Map performed with *KpnI* enzyme.

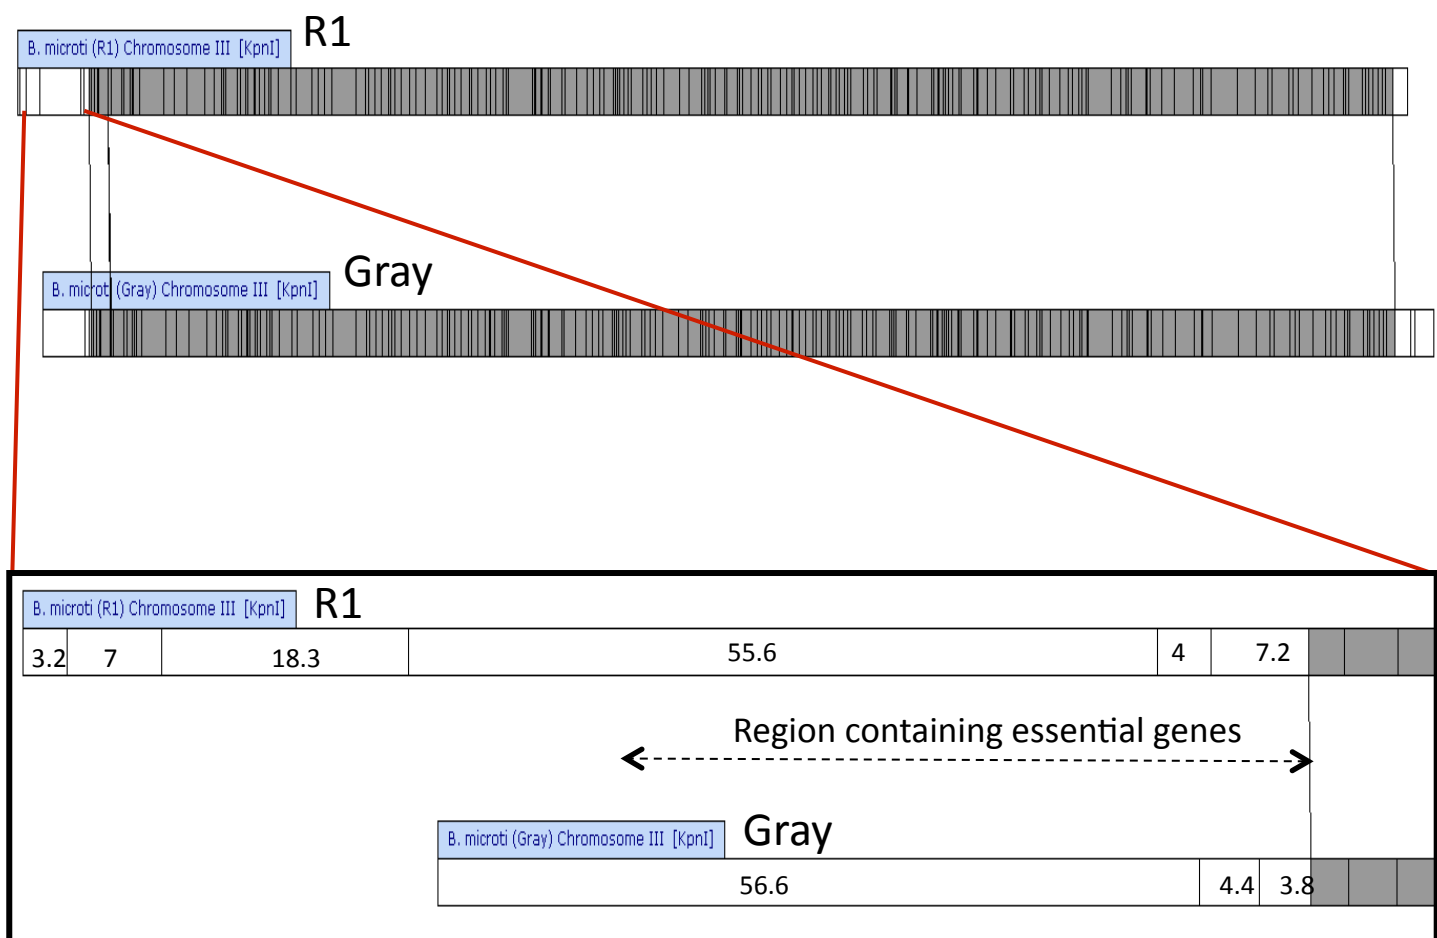

**Figure S1.** *B. microti* mitochondrial genome annotation and distribution of the genetic information among the four different types. The graphical output was obtained using Artemis (Sanger).

**Figure S2.** FASTA comparison of the IR-A and IR-B inverted repeats mapped to the mitochondrial genomes of *B. microti* R1 and Munich isolates. Dot plots represent the best local alignments. They were generated using Lalign software: [http://fasta.bioch.virginia.edu/fasta\\_www2/fasta\\_www.cgi?rm=lalign](http://fasta.bioch.virginia.edu/fasta_www2/fasta_www.cgi?rm=lalign)  
See appendix 1 for IR-A alignment and appendix 2 for IR-B alignment.

**Figure S3.** Comparison of the *B. microti* mitochondrial genome organization with that of *T. equi* and *T. parva*. Light grey boxes represent the protein coding genes. Dark grey represent inverted repeats.

**Figure S4.** Comparison of the linear monomeric *B. microti* mitochondrial genome organization with the concatenated mitochondrial genomes of *E. tenella*, *P. falciparum* and *P. gallinaceum*. Light grey boxes represent protein coding genes. Dark grey boxes represent inverted repeats.

**Figure S5.** Mosaic organization of *B. microti* subtelomeric regions based on the partially sequenced chromosome ends of the R1 strain [1]. S1 to S9 represent subtelomeric regions that share significant homology with each other. These regions contain putative protein coding genes including *Bmn*, *Tpr*-like (S4) and *vesa*-like genes (S2). Orientation of genes is provided by the < and > signs. Putative pseudogenes are indicated by \*. Incomplete genes at chromosome ends are marked by +. Full length copies of *bmn* genes are also found in the coding core of the chromosomes. The IIIb and Iva sub-telomeric regions contain the same set of putative essential genes in opposite orientation (S9). These genes are: *asns*, asparagine synthetase; *ach*, aconitase hydratase; *hyp*, hypothetical protein. The *NI-15* gene is highly homologous to a gene encoding the N1-15 surface antigen characterized in the MN1 *B. microti* isolate [2]. *Mfs*: transporter of the major facilitator superfamily.

**Figure S6.** *KpnI* optical map of the 5-prime region of chromosome III contig resulting from Whole Genome Mapping of *B. microti* R1 and Gray strains (IIIa extremity). The difference between the two maps includes a ~50 kbp region on the contig KIII\_ctg350 (database entry

FO082874) from the first release of *B. microti* R1 genome sequence. This region encompasses several essential genes.

### **References.**

1. Cornillot, E., et al., *Sequencing of the smallest Apicomplexan genome from the human pathogen Babesia microti*. Nucleic Acids Res, 2012. **40**(18): p. 9102-14.
2. Lodes M.J., et al, Serological expression cloning of novel immunoreactive antigens of *Babesia microti*. Infect Immun. 2000 May;68(5):2783-90.



**Table S1.** Size differences according to Whole Genome Map of *B. microti* R1 and Gray isolates.

|         | R1        | Chr. | Gray      |         |
|---------|-----------|------|-----------|---------|
| 204.891 | 1 378.451 | I    | 1 346.113 | 252.909 |
| 269.046 | 1 583.342 | II   | 1 599.022 | 254.668 |
| 23.169  | 1 852.388 | III  | 1 853.690 | 22.825  |
|         | 1 875.557 | IV   | 1 876.515 |         |

  

| <u>Gray - R1</u> |
|------------------|
| -32.338          |
| 15.680           |
| 1.302            |
| 0.958            |

## Appendix 1.

Best local alignment between the R1 and Munich IR-A repeats. It was performed with the blastn2 matrix. The alignment was performed with LAlign software at web site:

[http://fasta.bioch.virginia.edu/fasta\\_www2/fasta\\_www.cgi?rm=lalign](http://fasta.bioch.virginia.edu/fasta_www2/fasta_www.cgi?rm=lalign)

Waterman-Eggert score: 414; 167.9 bits; E(1) < 1.7e-45  
73.9% identity (73.9% similar) in 532 nt overlap (2-481:1-480)

```
R1      GCATTCGCTCATA-CGTACATAAATA-TCTTATGGTCCT--ATA-GTACACCACAAGCATA
      ::::::::::: : : ::::::::::: : ::::::::::: : : :: : : ::::::::::: : ::
Munich GCATTCGCTCATAACCT-CATAATAGT-TTATGGT--TTAATAAG-ACACCACAAACCTA
      10          20          30          40          50

      60          70          80          90          100         110
R1      TTATCTAC-TATAAAGTGATGTA-CATACACT-CACTGCACTACAATATAACC-TACATGT
      :::::: : ::::::::::: : : :::::: ::::::::::: : ::::::
Munich TTATCT-CGTATAAAGTGATGTAACA-ACACTTCACTGCACTACAATATAACCAT-CATGT
      60          70          80          90          100         110

      120         130          140         150
R1      -TAATC-----CATGTTTTGTTTTGGGTTAAA-----GAAACATGTATGGTAAT
      :: : : : : : : : : : : : : : : : : : : : : : : : : : : : : : : : :
Munich ATA-TCTCCTTCAT-----TAAAAGGGGGTAGTCGAAACATGT--GGTAAT
      120          130          140          150

      160         170         180         190         200
R1      -TGATAGTATACATATC-ACAATACT-AGC-ATCGTGCTGGATTGAGAACCAATTA----
      : :::::: : : : : : ::::::::::: : : : : : : : : : : : : : : : : :
Munich GTTATAGTAAACCTA-CTACAATACTTAACTATTGTAAGTACATAGAGA----ATTATTTG
      160         170         180         190         200         210

      210         220         230         240         250         260
R1      ACGGAGG-AAGTTTATGCTTCTTCAATAGGTACGA-TAGGCCTCGTTTTGTATACTGTTA
      :: : : : : : : : : : : : : : : : : : : : : : : : : : : : : : : :
Munich ACG-ATGTAAGTCAATGCTTCTTCTATAGGTAC-ACTAGGTATCGTTTTGTATACTG---
      220         230         240         250         260

      270         280         290         300         310
R1      CGGT----CTACAAAGC---TTCAAGAG-TCTGTGAAAGCTTCTAGCTTGATTGACTATT
      :: : : : : : : : : : : : : : : : : : : : : : : : : : : : : : : :
Munich --GTAAACTACA---CCGTTTCAA-AGGTCTGTGAAAGCTT-T-GCTTGATTGACTATT
      270         280         290         300         310

      320         330         340         350         360         370
R1      TGCTAGCAGTTAAGACTAA--CAGA-TATGTCTAACGCAGATTGTGT-ACATACCAAAGC
      :::::: : : : : : : : : : : : : : : : : : : : : : : : : : : : :
Munich TGCTAACAGTTA-G--TAAACCATAGTATGTTTAAACGCAGCTTGTGTGA-ATAACCAAAGC
      320         330         340         350         360         370

      380         390         400         410         420         430
R1      AGCTTTATATGGTATTCCTACTGGGATATGTGGTACTCAGACA--AAGA-TGACTCTCTACA
      : :::::: : : : : : : : : : : : : : : : : : : : : : : : : : : :
Munich AACTTTAT-TAGTATTCCTACTAGGATACGTGGTACTCAGACACGAGGACT-ACTCTCTACA
      380         390         400         410         420         430
```



## Appendix 2

Best local alignment between the R1 and Munich IR-B repeats. It was performed with the blastn2 matrix. The alignment was performed with LAlign software at web site:

[http://fasta.bioch.virginia.edu/fasta\\_www2/fasta\\_www.cgi?rm=lalign](http://fasta.bioch.virginia.edu/fasta_www2/fasta_www.cgi?rm=lalign)

Waterman-Eggert score: 972; 401.7 bits; E(1) < 1.5e-115  
70.4% identity (70.4% similar) in 1191 nt overlap (1-1013:1-1079)

```
R1      ATAGATTAGTACTTGTACTAAGCTACATAA----TAGGCTATAGTAGCATATAGAATTAC
      ::::::::::::::::::::::::::::::: :::  ::: :  ::::::::::::::::::::::
Munich ATAGATTAGTACTTGTACTAAGCTAC-TAACCTTTAG-C----GTAGCATATAGAATTAC
      10      20      30      40      50

      60      70      80      90      100     110
R1      TTGTTAGTTCTTCTATAGGTACAAC-ACTATCTATTTCGCAGTATATGTAGTGGTGTAGCT
      ::::::::::::::::::::::: :  :::  ::::::::::::::::::::::: :::
Munich TTGTTAGTTCTTCTATAGGTACA-CTACTAACTATTTCGCAGTATATGTAGTGGTGTGGCT
      60      70      80      90      100     110

      120     130     140     150     160     170
R1      ATTGCAGATACAT-ACGCATGTAATAGATGTGCGGCAGTACTAAGGTGCCTACAATAA-
      :::: ::::::: :: ::::::: ::::::: ::::::: ::::::: :::::::
Munich ATTGTAGATACATCAC-CATGTATTAGATATGCGGTAGTACTAAGGTGCCTAC--CTAAC
      120     130     140     150     160     170

      180     190     200     210     220
R1      -TACCATAACGTATCAT-----TACGTTAATATATCCTAAAGT-ATCAATA-GATGCTTT
      :::::::  ::  :: ::::::: ::::::: ::::  ::::  ::::  ::::  :::
Munich ATACCATAAC-----ATAGAGATATGTTAATATGTCTTAGAGTCATCGATAAGATACTCT
      180     190     200     210     220

      230     240     250     260     270     280
R1      ATG-ATAACTCCATTAGTACATAGGTATACTAG-TACATG-TATTGCTACTAGC-AGGTA
      ::  ::::::::::::::::::::::: ::::::: ::  :::::::  ::  ::
Munich ATGGATAACTCCATTAGTACATAGGTATACTAGATACATGATAATGCTACTAGCTAG-TA
      230     240     250     260     270     280

      290     300     310     320
R1      ACTATATATAGTGAC-TAGCA-----CTATGCTACTACTACC-----ATACCATACAAT
      :::: :::: :::::: ::::  :::::::  :::::::  :::::::  :::::::
Munich ---ATACATACTGACATA-CATGTCATCTATG-T-----TACCTCATTATA---TACAAT
      290     300     310     320     330

      330     340     350     360     370
R1      GATTAGA----TGGTCCGGTA-----GAGATCATTGTATCCCATGCTAT-GATATGTGTT
      ::  :::  :  ::  ::::::  :::::::::::::::  :  ::::::::::::::
Munich AATAAGACTTAT-----TAAACAAGAGATTATTGTATCCCATGCT-TAGATATGTGTT
      340     350     360     370     380

      380     390     400     410     420     430
R1      AGTTGATCCAA--TCAACTA--TTAATGCACAATATCAACAGATTATTGCGATTAACTA-
      ::  ::::  ::  :  ::  ::  ::::::  :::::::  ::  :  ::::::  :::::::  ::
Munich TGT--ATCAAACATTAA-TACCTTAATACACAATGTCTATAGATGATTGCGATTAAGTAA
      390     400     410     420     430     440
```
